# Supplementary material for: The life cycle of Trypanosoma (Nannomonas) congolense in the tsetse fly
Source: PubMed Central journal article supplement (PMC3384477; doi:10.1186/1756-3305-5-109), 2012-06-27

|                 | <b>Factor 1</b> | <b>Factor 2</b> |
|-----------------|-----------------|-----------------|
| <b>Knuc</b>     | 0.162           | -0.485          |
| <b>logL</b>     | 0.457           | 0.195           |
| <b>logW</b>     | -0.238          | 0.311           |
| <b>logKPost</b> | 0.145           | 0.578           |
| <b>logNPost</b> | 0.236           | 0.471           |
| <b>logNL</b>    | 0.416           | -0.056          |
| <b>logNW</b>    | -0.210          | 0.205           |
| <b>logKAnt</b>  | 0.449           | -0.167          |
| <b>logNAnt</b>  | 0.461           | 0.023           |

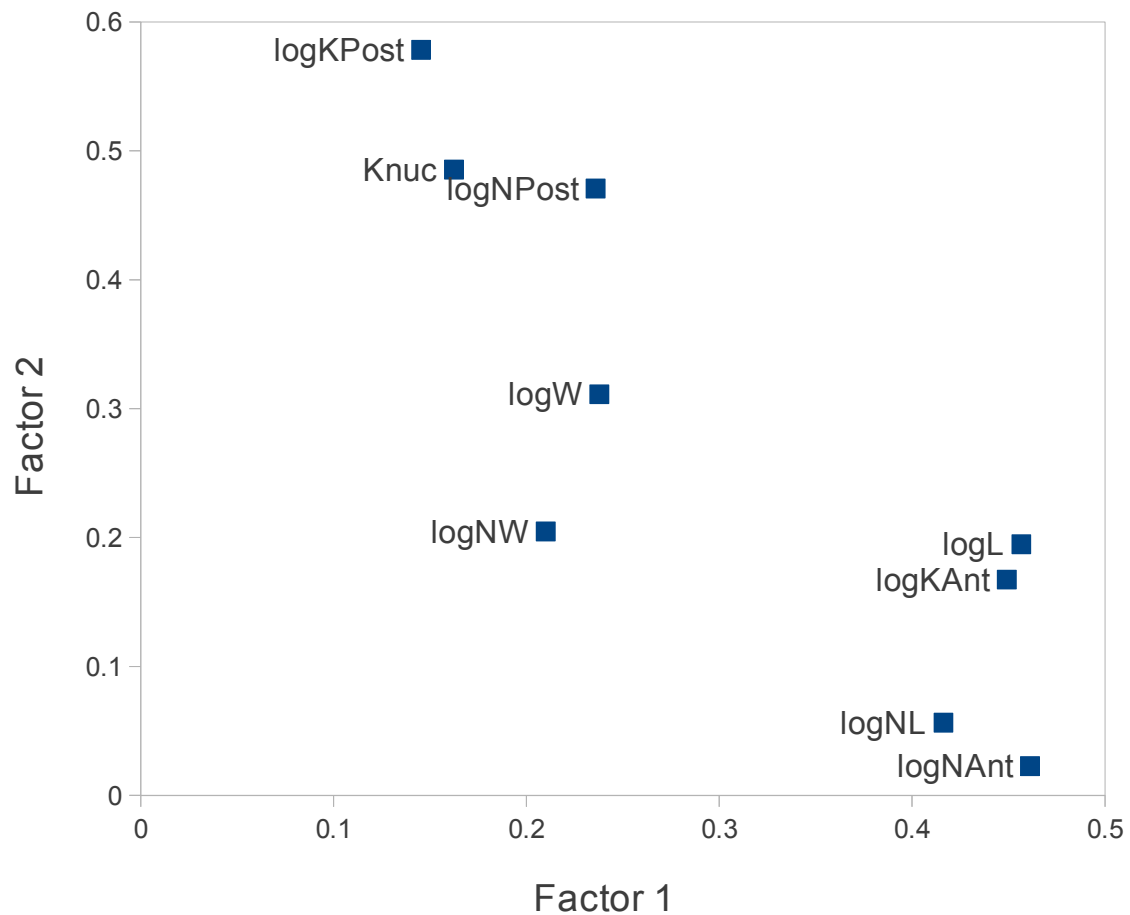

Supplement: 1756-3305-5-109-S2.pdf [file 1756-3305-5-109-S2.pdf]
